# Supplementary material for: Chromogranin A regulates gut permeability via the antagonistic actions of its proteolytic peptides
Source: bioRxiv or medRxiv preprint supplement (doi:10.1101/2020.09.19.304303), 2021-03-09
Supplement: Supplementary file [file media-1.pdf]

## DataAnalysis\_CgA-KO\_CST-KO\_WT

| Taxa__species__                  | P (rank test) | Adjusted P (Bonferroni) | FDR    | CgA-KO mean | CST-KO mean | WT mean | CgA-KO median | CST-KO median | WT median |
|----------------------------------|---------------|-------------------------|--------|-------------|-------------|---------|---------------|---------------|-----------|
| Cupriavidus_metallidurans        | 0.000032      | 0.00094                 | 0.0004 | 0.046       | 0.019       | 0.067   | 0.048         | 0.02          | 0.068     |
| Bacteroides_caccae               | 0.000044      | 0.0013                  | 0.0004 | 0.017       | 0.0014      | 0.03    | 0.018         | 0             | 0.029     |
| Bacteroides_faecichinchillae     | 0.000056      | 0.0016                  | 0.0004 | 0.013       | 0           | 0.041   | 0.013         | 0             | 0.038     |
| Barnesiella_viscericola          | 0.000064      | 0.0019                  | 0.0004 | 0.0096      | 0           | 0.014   | 0.01          | 0             | 0.014     |
| Parabacteroides_johnsonii        | 0.000075      | 0.0022                  | 0.0004 | 0.0014      | 0           | 0.015   | 0             | 0             | 0.014     |
| Bacteroides_sartorii             | 0.000012      | 0.0035                  | 0.0006 | 0.094       | 0.0054      | 0.13    | 0.092         | 0.0039        | 0.13      |
| Parabacteroides_goldsteinii      | 0.000014      | 0.0041                  | 0.0006 | 0.023       | 0.011       | 0.038   | 0.024         | 0.012         | 0.033     |
| Porphyromonas_sp._31_2           | 0.000017      | 0.005                   | 0.0006 | 0.01        | 0.0026      | 0.018   | 0.01          | 0             | 0.016     |
| Clostridiales_bacterium_VE20206  | 0.000017      | 0.005                   | 0.0006 | 0.012       | 0.031       | 0.02    | 0.012         | 0.026         | 0.02      |
| Gordonibacter_pamelaeeae         | 0.000031      | 0.0091                  | 0.0008 | 0.014       | 0.0085      | 0.018   | 0.013         | 0.01          | 0.017     |
| Lactobacillus_johnsonii          | 0.000032      | 0.0094                  | 0.0008 | 0.41        | 0.0068      | 0.19    | 0.41          | 0.0076        | 0.14      |
| Lactobacillus_reuteri            | 0.000033      | 0.0097                  | 0.0008 | 0.19        | 0.0014      | 0.11    | 0.2           | 0             | 0.08      |
| Lachnospiraceae_bacterium_A2     | 0.000039      | 0.011                   | 0.0009 | 0.15        | 0.57        | 0.16    | 0.13          | 0.59          | 0.16      |
| Prevotella_u_s                   | 0.000041      | 0.012                   | 0.0009 | 0.037       | 0.00055     | 0.043   | 0.034         | 0             | 0.04      |
| Bacteroides_dorei                | 0.000048      | 0.014                   | 0.0009 | 0.022       | 0.013       | 0.028   | 0.023         | 0.013         | 0.029     |
| Lactobacillus_animalis           | 0.000052      | 0.015                   | 0.001  | 0.097       | 0.017       | 0.079   | 0.098         | 0.015         | 0.081     |
| Adlercreutzia_equolifaciens      | 0.000061      | 0.018                   | 0.0011 | 0.025       | 0.019       | 0.034   | 0.024         | 0.019         | 0.033     |
| Odoribacter_splanchnicus         | 0.000073      | 0.021                   | 0.0012 | 0.012       | 0.0082      | 0.016   | 0.011         | 0.0092        | 0.016     |
| Burkholderiales_u_s              | 0.000076      | 0.022                   | 0.0012 | 0.011       | 0.0062      | 0.021   | 0.013         | 0.0052        | 0.021     |
| Bacteroides_ovatus               | 0.00008       | 0.023                   | 0.0012 | 0.026       | 0.012       | 0.03    | 0.025         | 0.01          | 0.027     |
| Phascolarctobacterium_sp._CAG207 | 0.000088      | 0.026                   | 0.0012 | 0.017       | 0.015       | 0.024   | 0.017         | 0.014         | 0.022     |
| Alistipes_timonensis             | 0.000089      | 0.026                   | 0.0012 | 0.028       | 0.025       | 0.068   | 0.027         | 0.024         | 0.066     |
| Bacteroides_acidifaciens         | 0.0001        | 0.029                   | 0.0013 | 0.12        | 0.065       | 0.15    | 0.12          | 0.053         | 0.15      |
| Alistipes_onderdonkii            | 0.00011       | 0.032                   | 0.0013 | 0.017       | 0.019       | 0.026   | 0.017         | 0.018         | 0.026     |
| Alistipes_inops                  | 0.00011       | 0.032                   | 0.0013 | 0.0077      | 0.0038      | 0.014   | 0.01          | 0             | 0.014     |
| Lactobacillus_apodemi            | 0.00012       | 0.035                   | 0.0013 | 0.017       | 0           | 0.0081  | 0.017         | 0             | 0.0063    |
| Blautia_producta                 | 0.00012       | 0.035                   | 0.0013 | 0.0057      | 0.019       | 0.021   | 0.0042        | 0.017         | 0.021     |
| Odoribacter_laneus               | 0.00014       | 0.041                   | 0.0015 | 0.016       | 0.012       | 0.022   | 0.015         | 0.013         | 0.022     |
| Tyzzrella_nexilis                | 0.00015       | 0.044                   | 0.0015 | 0.004       | 0.0075      | 0.014   | 0             | 0.0095        | 0.013     |
| Senegalimassilia_anaerobia       | 0.00015       | 0.044                   | 0.0015 | 0.007       | 0           | 0.011   | 0.0089        | 0             | 0.012     |
| Barnesiella_intestinihominis     | 0.00018       | 0.053                   | 0.0016 | 0.0092      | 0.0067      | 0.015   | 0.01          | 0.0089        | 0.016     |
| Bacteroides_faecis               | 0.00018       | 0.053                   | 0.0016 | 0.019       | 0.019       | 0.028   | 0.019         | 0.019         | 0.027     |
| Ruminococcus_u_s                 | 0.00019       | 0.056                   | 0.0017 | 0.0028      | 0           | 0.024   | 0             | 0             | 0.023     |
| Alistipes_shahii                 | 0.00025       | 0.073                   | 0.0021 | 0.031       | 0.037       | 0.047   | 0.03          | 0.036         | 0.047     |
| Parabacteroides_u_s              | 0.00026       | 0.076                   | 0.0021 | 0.037       | 0.0084      | 0.049   | 0.033         | 0.0078        | 0.051     |
| Lachnospiraceae_bacterium_31     | 0.00026       | 0.076                   | 0.0021 | 0.099       | 0.14        | 0.12    | 0.1           | 0.13          | 0.12      |
| Butyrivimonas_virosa             | 0.00026       | 0.076                   | 0.0021 | 0.0017      | 0.0084      | 0.012   | 0             | 0.01          | 0.014     |
| Eubacterium_hallii               | 0.00031       | 0.091                   | 0.0024 | 0.0037      | 0.0026      | 0.011   | 0             | 0             | 0.012     |
| Bacteroides_stercoris            | 0.00035       | 0.1                     | 0.0026 | 0.013       | 0.012       | 0.018   | 0.013         | 0.011         | 0.017     |
| Alistipes_putredinis             | 0.00036       | 0.11                    | 0.0026 | 0.025       | 0.024       | 0.034   | 0.026         | 0.024         | 0.034     |
| Dorea_formicigenerans            | 0.00044       | 0.13                    | 0.0031 | 0.0057      | 0.0053      | 0.015   | 0.0042        | 0.0045        | 0.014     |
| Eubacterium_siraeum              | 0.00049       | 0.14                    | 0.0034 | 0.021       | 0.02        | 0.03    | 0.02          | 0.019         | 0.03      |
| Parabacteroides_distasonis       | 0.00052       | 0.15                    | 0.0035 | 0.034       | 0.023       | 0.049   | 0.037         | 0.024         | 0.051     |
| Ruminococcus_bromii              | 0.00053       | 0.16                    | 0.0035 | 0.018       | 0.017       | 0.024   | 0.018         | 0.016         | 0.024     |
| Bacteroidales_u_s                | 0.00056       | 0.16                    | 0.0036 | 0.032       | 0.014       | 0.04    | 0.032         | 0.016         | 0.043     |
| Flavonifractor_plautii           | 0.00058       | 0.17                    | 0.0037 | 0.01        | 0.01        | 0.016   | 0.01          | 0.01          | 0.016     |
| Pseudoflavonifractor_capillosus  | 0.00059       | 0.17                    | 0.0037 | 0.016       | 0.016       | 0.022   | 0.016         | 0.015         | 0.022     |
| Pseudobutyrvivrio_u_s            | 0.00061       | 0.18                    | 0.0037 | 0.016       | 0           | 0.023   | 0.018         | 0             | 0.029     |
| Ruminococcaceae_bacterium_D16    | 0.0007        | 0.21                    | 0.0042 | 0.018       | 0.018       | 0.025   | 0.018         | 0.018         | 0.025     |
| Bacteroides_coprophilus          | 0.00071       | 0.21                    | 0.0042 | 0.04        | 0.027       | 0.045   | 0.042         | 0.026         | 0.045     |
| Butyrivimonas_u_s                | 0.001         | 0.29                    | 0.0056 | 0.013       | 0.0022      | 0       | 0.018         | 0             | 0         |
| Blautia_wexlerae                 | 0.001         | 0.29                    | 0.0056 | 0.0098      | 0.01        | 0.014   | 0.01          | 0.011         | 0.014     |
| Roseburia_inulinivorans          | 0.0011        | 0.32                    | 0.006  | 0.0036      | 0.001       | 0.0099  | 0             | 0             | 0.012     |
| Akkermansia_muciniphila          | 0.0011        | 0.32                    | 0.006  | 0.027       | 0.025       | 0.04    | 0.026         | 0.024         | 0.041     |
| Lactobacillus_murinus            | 0.0013        | 0.38                    | 0.0068 | 0.5         | 0.29        | 0.44    | 0.51          | 0.24          | 0.42      |
| Anaerofustis_stercorihominis     | 0.0013        | 0.38                    | 0.0068 | 0.0011      | 0.012       | 0.01    | 0             | 0.011         | 0.011     |
| Pontibacter_u_s                  | 0.0014        | 0.41                    | 0.0071 | 0.011       | 0           | 0.011   | 0.01          | 0             | 0.0087    |
| Clostridium_methylpentosum       | 0.0014        | 0.41                    | 0.0071 | 0.013       | 0.014       | 0.018   | 0.014         | 0.014         | 0.017     |
| Roseburia_hominis                | 0.0015        | 0.44                    | 0.0072 | 0.012       | 0.012       | 0.016   | 0.013         | 0.012         | 0.016     |
| Christensenella_minuta           | 0.0015        | 0.44                    | 0.0072 | 0.0052      | 0.008       | 0.012   | 0.0039        | 0.01          | 0.013     |
| Bacteroides_vulgatus             | 0.0015        | 0.44                    | 0.0072 | 0.018       | 0.017       | 0.028   | 0.017         | 0.014         | 0.027     |
| Bacteroides_gallinarum           | 0.0016        | 0.47                    | 0.0076 | 0.014       | 0           | 0.01    | 0.016         | 0             | 0.016     |

|                                    |        |      |        |         |        |        |        |        |        |
|------------------------------------|--------|------|--------|---------|--------|--------|--------|--------|--------|
| Firmicutes_bacterium_ASF500        | 0.0017 | 0.5  | 0.0077 | 0.11    | 0.11   | 0.14   | 0.11   | 0.11   | 0.14   |
| Faecalibacterium_prausnitzii       | 0.0017 | 0.5  | 0.0077 | 0.015   | 0.014  | 0.02   | 0.015  | 0.014  | 0.02   |
| Corynebacterium_mastitidis         | 0.0017 | 0.5  | 0.0077 | 0.0017  | 0.016  | 0.0072 | 0      | 0.016  | 0.0052 |
| Bifidobacterium_bifidum            | 0.0018 | 0.53 | 0.008  | 0.009   | 0.0086 | 0.014  | 0.0097 | 0.011  | 0.014  |
| Bacteroides_xylanisolvans          | 0.002  | 0.59 | 0.0087 | 0.02    | 0.018  | 0.026  | 0.019  | 0.015  | 0.026  |
| Oscillospiraceae_bacterium_VE20224 | 0.0021 | 0.62 | 0.009  | 0.0076  | 0.011  | 0.014  | 0.0087 | 0.01   | 0.013  |
| Lachnospiraceae_bacterium_7_1_581  | 0.0022 | 0.64 | 0.0092 | 0.0087  | 0.0091 | 0.015  | 0.01   | 0.011  | 0.015  |
| Lachnospiraceae_bacterium_284      | 0.0022 | 0.64 | 0.0092 | 0.083   | 0.11   | 0.13   | 0.084  | 0.11   | 0.12   |
| Enterococcus_faecium               | 0.0023 | 0.67 | 0.0095 | 0.009   | 0.0047 | 0.014  | 0.0095 | 0.0022 | 0.012  |
| Alistipes_ihumii                   | 0.0024 | 0.7  | 0.0098 | 0.0096  | 0.0099 | 0.014  | 0.01   | 0.011  | 0.014  |
| Oscillibacter_sp._13               | 0.0027 | 0.79 | 0.011  | 0.13    | 0.13   | 0.17   | 0.13   | 0.12   | 0.17   |
| Lachnospiraceae_bacterium_32       | 0.0027 | 0.79 | 0.011  | 0.12    | 0.22   | 0.13   | 0.12   | 0.2    | 0.12   |
| Clostridioides_difficile           | 0.0031 | 0.91 | 0.012  | 0.058   | 0.091  | 0.078  | 0.056  | 0.084  | 0.076  |
| Turicibacter_sanguinis             | 0.0032 | 0.94 | 0.012  | 0.033   | 0      | 0      | 0.03   | 0      | 0      |
| Lactobacillus_sp._ASF360           | 0.0032 | 0.94 | 0.012  | 0       | 0      | 0.1    | 0      | 0      | 0.0095 |
| Coprobacillus_u_s                  | 0.0032 | 0.94 | 0.012  | 0.0068  | 0      | 0      | 0.0055 | 0      | 0      |
| Bacteroides_salyersiae             | 0.0032 | 0.94 | 0.012  | 0.0065  | 0.0077 | 0.013  | 0.0083 | 0.0087 | 0.013  |
| Methanobrevibacter_smithii         | 0.0035 | 1    | 0.013  | 0.01    | 0.0079 | 0.016  | 0.01   | 0.0092 | 0.014  |
| Subdoligranulum_variabale          | 0.0036 | 1    | 0.013  | 0.0011  | 0      | 0.0067 | 0      | 0      | 0.0095 |
| Candidatus_Arthromitus_sp._SFBmou  | 0.0036 | 1    | 0.013  | 0.0013  | 0      | 0.026  | 0      | 0      | 0.008  |
| Bacteroides_uniformis              | 0.0039 | 1    | 0.014  | 0.041   | 0.033  | 0.063  | 0.042  | 0.034  | 0.067  |
| Parabacteroides_sp._20_3           | 0.004  | 1    | 0.014  | 0.031   | 0.016  | 0.042  | 0.032  | 0.022  | 0.048  |
| Parabacteroides_merdae             | 0.0041 | 1    | 0.014  | 0.016   | 0.014  | 0.022  | 0.017  | 0.013  | 0.023  |
| Lachnoclostridium_u_s              | 0.0043 | 1    | 0.015  | 0.0091  | 0.0097 | 0.0014 | 0.0097 | 0.0092 | 0      |
| Alistipes_senegalensis             | 0.0044 | 1    | 0.015  | 0.02    | 0.028  | 0.026  | 0.02   | 0.025  | 0.026  |
| Alistipes_sp._AL1                  | 0.0052 | 1    | 0.017  | 0.015   | 0.017  | 0.02   | 0.014  | 0.016  | 0.019  |
| Agathobaculum_desmolans            | 0.0059 | 1    | 0.019  | 0.0069  | 0.014  | 0.013  | 0.01   | 0.013  | 0.014  |
| Alistipes_finegoldii               | 0.0066 | 1    | 0.021  | 0.01    | 0.013  | 0.015  | 0.011  | 0.012  | 0.014  |
| Clostridium_clostridioforme        | 0.0068 | 1    | 0.022  | 0.014   | 0.015  | 0.019  | 0.013  | 0.014  | 0.019  |
| Lachnospiraceae_bacterium_101      | 0.0072 | 1    | 0.023  | 0.095   | 0.11   | 0.12   | 0.094  | 0.11   | 0.12   |
| Eubacterium_sp._142                | 0.0072 | 1    | 0.023  | 0.067   | 0.076  | 0.081  | 0.069  | 0.067  | 0.076  |
| Porphyromonas_u_s                  | 0.0076 | 1    | 0.024  | 0.0045  | 0.0013 | 0.01   | 0      | 0      | 0.011  |
| Eubacterium_plexicaudatum          | 0.008  | 1    | 0.025  | 0.069   | 0.081  | 0.086  | 0.069  | 0.078  | 0.083  |
| Lachnospiraceae_bacterium_M181     | 0.0087 | 1    | 0.026  | 0.13    | 0.099  | 0.13   | 0.12   | 0.092  | 0.12   |
| Enterorhabdus_caecimuris           | 0.0087 | 1    | 0.026  | 0.18    | 0.19   | 0.24   | 0.18   | 0.19   | 0.24   |
| Lachnospiraceae_u_s                | 0.01   | 1    | 0.029  | 0.023   | 0.025  | 0.036  | 0.02   | 0.024  | 0.033  |
| Butyrivibrio_synergistica          | 0.01   | 1    | 0.029  | 0.0012  | 0      | 0.0079 | 0      | 0      | 0.0078 |
| Bacteroides_timonensis             | 0.01   | 1    | 0.029  | 0.00084 | 0      | 0.007  | 0      | 0      | 0.0065 |
| Streptococcus_pneumoniae           | 0.012  | 1    | 0.033  | 0.0027  | 0      | 0      | 0      | 0      | 0      |
| Oribacterium_sp._NK2B42            | 0.012  | 1    | 0.033  | 0.0034  | 0      | 0      | 0      | 0      | 0      |
| Lactobacillus_gasseri              | 0.012  | 1    | 0.033  | 0.0021  | 0      | 0      | 0      | 0      | 0      |
| Lachnoclostridium_phytofermentans  | 0.012  | 1    | 0.033  | 0.0088  | 0.007  | 0.011  | 0.0084 | 0.0074 | 0.011  |
| Imtechella_halotolerans            | 0.012  | 1    | 0.033  | 0.01    | 0.002  | 0.0023 | 0.013  | 0      | 0      |
| Marvinbryantia_formatexigens       | 0.013  | 1    | 0.036  | 0.01    | 0.014  | 0.014  | 0.011  | 0.013  | 0.014  |
| Dorea_longicatena                  | 0.015  | 1    | 0.041  | 0.0077  | 0.0089 | 0.012  | 0.0097 | 0.0094 | 0.012  |
| Helicobacter_hepaticus             | 0.019  | 1    | 0.052  | 0.2     | 0.24   | 0.27   | 0.22   | 0.24   | 0.29   |
| Ruminococcus_sp._5_1_39BFAA        | 0.02   | 1    | 0.053  | 0.0075  | 0.0079 | 0.012  | 0.0087 | 0.0095 | 0.015  |
| Enterorhabdus_mucosicola           | 0.02   | 1    | 0.053  | 0.17    | 0.17   | 0.21   | 0.16   | 0.16   | 0.22   |
| Helicobacter_bilis                 | 0.021  | 1    | 0.055  | 0.017   | 0      | 0.019  | 0.012  | 0      | 0      |
| Lachnospiraceae_bacterium_COE1     | 0.022  | 1    | 0.057  | 0.21    | 0.27   | 0.13   | 0.2    | 0.28   | 0.13   |
| Blautia_sp._KLE_1732               | 0.022  | 1    | 0.057  | 0.01    | 0.0091 | 0.012  | 0.01   | 0.0095 | 0.012  |
| Bacteroides_u_s                    | 0.022  | 1    | 0.057  | 0.026   | 0.021  | 0.033  | 0.022  | 0.016  | 0.029  |
| Mucispirillum_schaedleri           | 0.023  | 1    | 0.059  | 0.13    | 0.16   | 0.21   | 0.14   | 0.17   | 0.22   |
| Herbaspirillum_u_s                 | 0.025  | 1    | 0.063  | 0.00089 | 0      | 0.0025 | 0      | 0      | 0.0022 |
| Clostridium_saccharolyticum        | 0.025  | 1    | 0.063  | 0.0076  | 0.0045 | 0.012  | 0.0092 | 0      | 0.013  |
| Alistipes_obesi                    | 0.026  | 1    | 0.065  | 0.016   | 0.018  | 0.02   | 0.015  | 0.017  | 0.019  |
| Staphylococcus_xylosum             | 0.031  | 1    | 0.076  | 0       | 0.0053 | 0.006  | 0      | 0.0022 | 0.0042 |
| Clostridiales_bacterium_VE20209    | 0.031  | 1    | 0.076  | 0.01    | 0.0068 | 0.012  | 0.011  | 0.0097 | 0.013  |
| Lactobacillus_u_s                  | 0.032  | 1    | 0.077  | 0.0051  | 0.0018 | 0      | 0.0022 | 0      | 0      |
| Erysipelotrichaceae_u_s            | 0.033  | 1    | 0.079  | 0.0066  | 0.0034 | 0.011  | 0.0027 | 0      | 0.012  |
| Clostridium_sp._ASF502             | 0.034  | 1    | 0.081  | 0.13    | 0.16   | 0.15   | 0.13   | 0.15   | 0.14   |
| butyrateproducing_bacterium_SM41   | 0.037  | 1    | 0.087  | 0.0086  | 0.0041 | 0.0094 | 0.0092 | 0      | 0.011  |
| Clostridiales_bacterium_VE20227    | 0.038  | 1    | 0.089  | 0       | 0.001  | 0.0049 | 0      | 0      | 0      |
| Weissella_u_s                      | 0.04   | 1    | 0.093  | 0       | 0      | 0.0025 | 0      | 0      | 0      |

|                                    |       |   |       |         |         |         |        |        |        |
|------------------------------------|-------|---|-------|---------|---------|---------|--------|--------|--------|
| Ruminococcus_torques               | 0.041 | 1 | 0.095 | 0.0043  | 0.0042  | 0.0079  | 0.0035 | 0.0035 | 0.0095 |
| Muricauda_u_s                      | 0.045 | 1 | 0.1   | 0.00063 | 0.0043  | 0.0013  | 0      | 0.0055 | 0      |
| Clostridium_scindens               | 0.046 | 1 | 0.1   | 0.0079  | 0.0052  | 0.0015  | 0.01   | 0.0039 | 0      |
| Intestinimonas_butyrificiproducens | 0.047 | 1 | 0.11  | 0.018   | 0.019   | 0.023   | 0.018  | 0.019  | 0.022  |
| Blautia_obeum                      | 0.047 | 1 | 0.11  | 0.0036  | 0.0017  | 0.0071  | 0      | 0      | 0.011  |
| Coriobacteriaceae_bacterium_6813   | 0.051 | 1 | 0.11  | 0.0049  | 0       | 0.0045  | 0.0042 | 0      | 0      |
| Desulfovibrio_sp_Dsv1              | 0.052 | 1 | 0.11  | 0.0036  | 0.0092  | 0.0014  | 0      | 0.011  | 0      |
| Streptococcus_thermophilus         | 0.053 | 1 | 0.12  | 0.013   | 0.011   | 0.018   | 0.012  | 0.01   | 0.017  |
| Desulfovibrio_u_s                  | 0.055 | 1 | 0.12  | 0.014   | 0.012   | 0.018   | 0.014  | 0.014  | 0.018  |
| Enterococcus_faecalis              | 0.065 | 1 | 0.14  | 0.12    | 0.16    | 0.14    | 0.12   | 0.13   | 0.15   |
| Acetobacter_u_s                    | 0.065 | 1 | 0.14  | 0.0021  | 0       | 0.0086  | 0      | 0      | 0      |
| Pedobacter_u_s                     | 0.067 | 1 | 0.14  | 0.0031  | 0.00055 | 0.0046  | 0.0022 | 0      | 0.0032 |
| Biophila_u_s                       | 0.076 | 1 | 0.16  | 0.0076  | 0.0057  | 0.011   | 0.01   | 0.0047 | 0.014  |
| Oscillibacter_ruminantium          | 0.085 | 1 | 0.18  | 0.003   | 0.0054  | 0.0082  | 0      | 0.0042 | 0.01   |
| Hungateella_hathewayi              | 0.1   | 1 | 0.21  | 0.016   | 0.013   | 0.018   | 0.016  | 0.014  | 0.018  |
| Christensenella_timonensis         | 0.11  | 1 | 0.23  | 0.025   | 0.029   | 0.029   | 0.025  | 0.028  | 0.029  |
| Bacteroides_intestinalis           | 0.11  | 1 | 0.23  | 0.0053  | 0.011   | 0.0075  | 0.0047 | 0.012  | 0.011  |
| Rhizobiales_u_s                    | 0.12  | 1 | 0.23  | 0       | 0.00055 | 0.0048  | 0      | 0      | 0      |
| Patulibacter_u_s                   | 0.12  | 1 | 0.23  | 0.006   | 0.0019  | 0.0066  | 0.0071 | 0      | 0.0089 |
| Eubacterium_eligens                | 0.12  | 1 | 0.23  | 0.00084 | 0       | 0.003   | 0      | 0      | 0      |
| Erysipelotrichaceae_bacterium_21_3 | 0.12  | 1 | 0.23  | 0.00071 | 0       | 0.0036  | 0      | 0      | 0      |
| Desulfovibrio_desulfuricans        | 0.12  | 1 | 0.23  | 0.019   | 0.019   | 0.024   | 0.019  | 0.015  | 0.025  |
| Clostridiales_u_s                  | 0.12  | 1 | 0.23  | 0.1     | 0.045   | 0.045   | 0.067  | 0.035  | 0.04   |
| Bacteroides_sp_3_1_33FAA           | 0.12  | 1 | 0.23  | 0.009   | 0.0053  | 0.026   | 0      | 0      | 0.024  |
| Anaerotruncus_sp_G32012            | 0.12  | 1 | 0.23  | 0.15    | 0.11    | 0.14    | 0.15   | 0.11   | 0.14   |
| Thermanaerovibrio_u_s              | 0.13  | 1 | 0.24  | 0       | 0       | 0.0015  | 0      | 0      | 0      |
| Ruminococcus_lactaris              | 0.13  | 1 | 0.24  | 0.0021  | 0       | 0       | 0      | 0      | 0      |
| Methylophilum_u_s                  | 0.13  | 1 | 0.24  | 0.0023  | 0       | 0       | 0      | 0      | 0      |
| Lachnospira_multipara              | 0.13  | 1 | 0.24  | 0       | 0       | 0.0021  | 0      | 0      | 0      |
| Escherichia_coli                   | 0.13  | 1 | 0.24  | 0       | 0.0032  | 0       | 0      | 0      | 0      |
| Clostridiales_bacterium_VE20226    | 0.13  | 1 | 0.24  | 0       | 0       | 0.0016  | 0      | 0      | 0      |
| Burkholderiales_bacterium_1_1_47   | 0.13  | 1 | 0.24  | 0.0018  | 0       | 0       | 0      | 0      | 0      |
| Bacteroides_sp_D22                 | 0.13  | 1 | 0.24  | 0       | 0.0054  | 0       | 0      | 0      | 0      |
| Anaerostipes_hadrus                | 0.13  | 1 | 0.24  | 0       | 0       | 0.0018  | 0      | 0      | 0      |
| Roseburia_intestinalis             | 0.14  | 1 | 0.25  | 0.0038  | 0.0047  | 0.0096  | 0      | 0      | 0.013  |
| Lachnospiraceae_bacterium_oral_ta  | 0.14  | 1 | 0.25  | 0.001   | 0       | 0.0034  | 0      | 0      | 0      |
| Clostridiales_bacterium_NK3B98     | 0.14  | 1 | 0.25  | 0.001   | 0       | 0.0033  | 0      | 0      | 0      |
| Stenotrophomonas_maltophilia       | 0.17  | 1 | 0.3   | 0       | 0.0011  | 0.0032  | 0      | 0      | 0      |
| Ruminococcus_sp_SR15               | 0.17  | 1 | 0.3   | 0.0031  | 0       | 0.0013  | 0      | 0      | 0      |
| Candidatus_Arthromitus_u_s         | 0.18  | 1 | 0.32  | 0.0055  | 0.0013  | 0       | 0      | 0      | 0      |
| Neisseriaceae_u_s                  | 0.19  | 1 | 0.33  | 0.0018  | 0.001   | 0.0046  | 0      | 0      | 0.0022 |
| Bacteroides_rodentium              | 0.2   | 1 | 0.35  | 0.0052  | 0.0073  | 0.011   | 0      | 0.0083 | 0.015  |
| Erysipelotrichaceae_bacterium_6_1_ | 0.21  | 1 | 0.36  | 0.0075  | 0.026   | 0.021   | 0      | 0.023  | 0.016  |
| Delftia_u_s                        | 0.21  | 1 | 0.36  | 0       | 0.0032  | 0.002   | 0      | 0      | 0      |
| Spiribacter_u_s                    | 0.22  | 1 | 0.37  | 0.007   | 0.0054  | 0.011   | 0.0047 | 0      | 0.016  |
| Desulfomicrobium_u_s               | 0.22  | 1 | 0.37  | 0.0014  | 0       | 0.0012  | 0      | 0      | 0      |
| Coprobacter_u_s                    | 0.22  | 1 | 0.37  | 0.016   | 0       | 0.014   | 0      | 0      | 0      |
| Lachnospiraceae_bacterium_1_4_56   | 0.24  | 1 | 0.4   | 0.0066  | 0.0034  | 0.0076  | 0.0089 | 0      | 0.011  |
| Lachnospiraceae_bacterium_5_1_63   | 0.27  | 1 | 0.42  | 0.0072  | 0.0045  | 0.0034  | 0.0087 | 0.0042 | 0      |
| Clostridium_bolteae                | 0.27  | 1 | 0.42  | 0.0097  | 0.0075  | 0.013   | 0.01   | 0.0081 | 0.016  |
| Streptococcus_agalactiae           | 0.28  | 1 | 0.42  | 0.0023  | 0.0063  | 0.004   | 0      | 0      | 0      |
| Ruminococcus_gnavus                | 0.28  | 1 | 0.42  | 0.0048  | 0.0082  | 0.0039  | 0      | 0.01   | 0      |
| Bacteroides_sp_3_1_40A             | 0.28  | 1 | 0.42  | 0.031   | 0.015   | 0.031   | 0.037  | 0.02   | 0.026  |
| Thermoanaerobacterium_u_s          | 0.31  | 1 | 0.42  | 0.00055 | 0.0028  | 0.00063 | 0      | 0      | 0      |
| Lachnospiraceae_bacterium_5_1_57   | 0.32  | 1 | 0.42  | 0.00084 | 0.0023  | 0       | 0      | 0      | 0      |
| Lachnospiraceae_bacterium_3_1_46   | 0.32  | 1 | 0.42  | 0.0015  | 0       | 0.005   | 0      | 0      | 0      |
| Eggerthella_u_s                    | 0.32  | 1 | 0.42  | 0.0097  | 0.0041  | 0       | 0      | 0      | 0      |
| Dictyoglomus_u_s                   | 0.32  | 1 | 0.42  | 0.00045 | 0       | 0.0011  | 0      | 0      | 0      |
| Desulfobulbus_u_s                  | 0.32  | 1 | 0.42  | 0       | 0.00045 | 0.0014  | 0      | 0      | 0      |
| Coproccoccus_comes                 | 0.32  | 1 | 0.42  | 0.00063 | 0       | 0.0023  | 0      | 0      | 0      |
| Candidatus_Arthromitus_sp_SFBmou   | 0.32  | 1 | 0.42  | 0       | 0.0037  | 0.017   | 0      | 0      | 0      |
| Bacteroides_fragilis               | 0.32  | 1 | 0.42  | 0.014   | 0.014   | 0.016   | 0.014  | 0.014  | 0.016  |
| Thioalkalivibrio_u_s               | 0.33  | 1 | 0.42  | 0.00045 | 0.00045 | 0.0018  | 0      | 0      | 0      |
| Oscillibacter_valericigenes        | 0.33  | 1 | 0.42  | 0.0011  | 0.00095 | 0.0035  | 0      | 0      | 0      |

|                                    |      |   |      |         |         |         |   |   |   |
|------------------------------------|------|---|------|---------|---------|---------|---|---|---|
| Eggerthella_sp_HGA1                | 0.33 | 1 | 0.42 | 0.0017  | 0       | 0.0018  | 0 | 0 | 0 |
| Clostridium_asparagiforme          | 0.33 | 1 | 0.42 | 0.002   | 0       | 0.0022  | 0 | 0 | 0 |
| Anaeromyxobacter_u_s               | 0.33 | 1 | 0.42 | 0.00086 | 0       | 0.0013  | 0 | 0 | 0 |
| Alistipes_indistinctus             | 0.33 | 1 | 0.42 | 0.00095 | 0       | 0.0021  | 0 | 0 | 0 |
| Peptostreptococcaceae_u_s          | 0.34 | 1 | 0.42 | 0.00063 | 0       | 0.0023  | 0 | 0 | 0 |
| Oribacterium_u_s                   | 0.34 | 1 | 0.42 | 0       | 0.00078 | 0.0018  | 0 | 0 | 0 |
| Enorma_massiliensis                | 0.34 | 1 | 0.42 | 0.001   | 0       | 0.002   | 0 | 0 | 0 |
| Acinetobacter_u_s                  | 0.34 | 1 | 0.42 | 0       | 0.0025  | 0.00084 | 0 | 0 | 0 |
| Zymomonas_mobilis                  | 0.37 | 1 | 0.42 | 0.00089 | 0       | 0       | 0 | 0 | 0 |
| Veillonella_u_s                    | 0.37 | 1 | 0.42 | 0       | 0       | 0.00084 | 0 | 0 | 0 |
| Treponema_primitia                 | 0.37 | 1 | 0.42 | 0.00045 | 0       | 0       | 0 | 0 | 0 |
| Thermodesulfovibrio_u_s            | 0.37 | 1 | 0.42 | 0       | 0       | 0.00095 | 0 | 0 | 0 |
| Thermodesulfatator_u_s             | 0.37 | 1 | 0.42 | 0       | 0.0018  | 0.0011  | 0 | 0 | 0 |
| Thermaerobacter_u_s                | 0.37 | 1 | 0.42 | 0       | 0       | 0.00095 | 0 | 0 | 0 |
| Sutterella_wadsworthensis          | 0.37 | 1 | 0.42 | 0       | 0       | 0.0064  | 0 | 0 | 0 |
| Streptococcus_salivarius           | 0.37 | 1 | 0.42 | 0       | 0       | 0.00045 | 0 | 0 | 0 |
| Streptococcus_orisratti            | 0.37 | 1 | 0.42 | 0       | 0.0011  | 0       | 0 | 0 | 0 |
| Staphylococcus_lentus              | 0.37 | 1 | 0.42 | 0.00089 | 0       | 0       | 0 | 0 | 0 |
| Rickettsia_felis                   | 0.37 | 1 | 0.42 | 0.0022  | 0       | 0       | 0 | 0 | 0 |
| Psychroflexus_u_s                  | 0.37 | 1 | 0.42 | 0.0026  | 0.0015  | 0       | 0 | 0 | 0 |
| Pseudomonas_u_s                    | 0.37 | 1 | 0.42 | 0       | 0       | 0.00071 | 0 | 0 | 0 |
| Polynucleobacter_u_s               | 0.37 | 1 | 0.42 | 0       | 0       | 0.00071 | 0 | 0 | 0 |
| Phyllobacteriaceae_u_s             | 0.37 | 1 | 0.42 | 0       | 0       | 0.0012  | 0 | 0 | 0 |
| Paraprevotella_u_s                 | 0.37 | 1 | 0.42 | 0       | 0       | 0.0014  | 0 | 0 | 0 |
| Parabacteroides_sp_ASF519          | 0.37 | 1 | 0.42 | 0       | 0       | 0.0061  | 0 | 0 | 0 |
| Paenibacillus_u_s                  | 0.37 | 1 | 0.42 | 0.00055 | 0       | 0       | 0 | 0 | 0 |
| Oxalobacter_formigenes             | 0.37 | 1 | 0.42 | 0       | 0.00084 | 0       | 0 | 0 | 0 |
| Oscillospiraceae_u_s               | 0.37 | 1 | 0.42 | 0.0035  | 0       | 0       | 0 | 0 | 0 |
| Micrococcaceae_u_s                 | 0.37 | 1 | 0.42 | 0       | 0       | 0.0011  | 0 | 0 | 0 |
| Microbacterium_barkeri             | 0.37 | 1 | 0.42 | 0       | 0.0013  | 0       | 0 | 0 | 0 |
| Methanomassiliicoccus_u_s          | 0.37 | 1 | 0.42 | 0       | 0.004   | 0       | 0 | 0 | 0 |
| Megasphaera_u_s                    | 0.37 | 1 | 0.42 | 0.00089 | 0       | 0.00071 | 0 | 0 | 0 |
| Leuconostoc_u_s                    | 0.37 | 1 | 0.42 | 0       | 0.0012  | 0       | 0 | 0 | 0 |
| Leuconostoc_mesenteroides          | 0.37 | 1 | 0.42 | 0.00071 | 0       | 0       | 0 | 0 | 0 |
| Leptospira_u_s                     | 0.37 | 1 | 0.42 | 0.0025  | 0       | 0.0016  | 0 | 0 | 0 |
| Lactobacillus_rhamnosus            | 0.37 | 1 | 0.42 | 0.00071 | 0       | 0       | 0 | 0 | 0 |
| Kurthia_u_s                        | 0.37 | 1 | 0.42 | 0.00045 | 0       | 0       | 0 | 0 | 0 |
| Kurthia_sp_Dielmo                  | 0.37 | 1 | 0.42 | 0.002   | 0       | 0       | 0 | 0 | 0 |
| Kocuria_rhizophila                 | 0.37 | 1 | 0.42 | 0       | 0       | 0.00089 | 0 | 0 | 0 |
| Facklamia_u_s                      | 0.37 | 1 | 0.42 | 0       | 0.00095 | 0       | 0 | 0 | 0 |
| Eubacterium_rectale                | 0.37 | 1 | 0.42 | 0.00089 | 0       | 0       | 0 | 0 | 0 |
| Escherichia_u_s                    | 0.37 | 1 | 0.42 | 0       | 0       | 0.002   | 0 | 0 | 0 |
| Erysipelotrichaceae_bacterium_5_2_ | 0.37 | 1 | 0.42 | 0       | 0       | 0.0012  | 0 | 0 | 0 |
| Enterococcus_italicus              | 0.37 | 1 | 0.42 | 0.0011  | 0       | 0       | 0 | 0 | 0 |
| Dorea_u_s                          | 0.37 | 1 | 0.42 | 0.0016  | 0.0029  | 0       | 0 | 0 | 0 |
| Desulfotomaculum_u_s               | 0.37 | 1 | 0.42 | 0       | 0       | 0.00055 | 0 | 0 | 0 |
| Dehalococcoides_mccartyi           | 0.37 | 1 | 0.42 | 0       | 0       | 0.00063 | 0 | 0 | 0 |
| Cytophaga_u_s                      | 0.37 | 1 | 0.42 | 0.00032 | 0       | 0       | 0 | 0 | 0 |
| Coprothermobacter_u_s              | 0.37 | 1 | 0.42 | 0.00084 | 0       | 0       | 0 | 0 | 0 |
| Coprobacillus_sp_8_2_54BFAA        | 0.37 | 1 | 0.42 | 0.00063 | 0       | 0       | 0 | 0 | 0 |
| Clostridium_symbiosum              | 0.37 | 1 | 0.42 | 0.0013  | 0.0012  | 0       | 0 | 0 | 0 |
| Clostridium_aminophilum            | 0.37 | 1 | 0.42 | 0       | 0       | 0.0013  | 0 | 0 | 0 |
| Chitinophagaceae_u_s               | 0.37 | 1 | 0.42 | 0.0034  | 0       | 0       | 0 | 0 | 0 |
| Carnobacterium_u_s                 | 0.37 | 1 | 0.42 | 0.0015  | 0       | 0.00095 | 0 | 0 | 0 |
| Carnobacterium_inhibens            | 0.37 | 1 | 0.42 | 0       | 0.001   | 0       | 0 | 0 | 0 |
| Cardiobacteriaceae_u_s             | 0.37 | 1 | 0.42 | 0       | 0.0051  | 0       | 0 | 0 | 0 |
| Candidatus_Ferribacterium_u_s      | 0.37 | 1 | 0.42 | 0.00055 | 0       | 0       | 0 | 0 | 0 |
| Butyrivibrio_u_s                   | 0.37 | 1 | 0.42 | 0       | 0       | 0.00084 | 0 | 0 | 0 |
| Butyrivibrio_pulliaecorum          | 0.37 | 1 | 0.42 | 0       | 0.0011  | 0       | 0 | 0 | 0 |
| butyrateproducing_bacterium_SS34   | 0.37 | 1 | 0.42 | 0       | 0       | 0.0012  | 0 | 0 | 0 |
| Brevundimonas_u_s                  | 0.37 | 1 | 0.42 | 0       | 0       | 0.00095 | 0 | 0 | 0 |
| Bifidobacterium_animalis           | 0.37 | 1 | 0.42 | 0.0016  | 0       | 0.0014  | 0 | 0 | 0 |
| Bavariicoccus_seileri              | 0.37 | 1 | 0.42 | 0.00095 | 0       | 0       | 0 | 0 | 0 |
| Bacteroides_thetaiotaomicron       | 0.37 | 1 | 0.42 | 0.00071 | 0       | 0       | 0 | 0 | 0 |

|                                  |      |   |      |         |         |         |       |        |       |
|----------------------------------|------|---|------|---------|---------|---------|-------|--------|-------|
| Bacteroides_stercorisoris        | 0.37 | 1 | 0.42 | 0       | 0       | 0.0011  | 0     | 0      | 0     |
| bacterium_LF3                    | 0.37 | 1 | 0.42 | 0       | 0       | 0.0011  | 0     | 0      | 0     |
| Atopobium_parvulum               | 0.37 | 1 | 0.42 | 0       | 0       | 0.00055 | 0     | 0      | 0     |
| Alistipes_u_s                    | 0.37 | 1 | 0.42 | 0.0037  | 0.0033  | 0       | 0     | 0      | 0     |
| Aerococcus_u_s                   | 0.37 | 1 | 0.42 | 0       | 0       | 0.0013  | 0     | 0      | 0     |
| Actinobacteria_u_s               | 0.37 | 1 | 0.42 | 0.00095 | 0       | 0       | 0     | 0      | 0     |
| Acetobacterium_u_s               | 0.37 | 1 | 0.42 | 0.00055 | 0       | 0       | 0     | 0      | 0     |
| Rikenella_microfusus             | 0.43 | 1 | 0.48 | 0.0039  | 0.0065  | 0.0036  | 0     | 0.0092 | 0     |
| Clostridiales_bacterium_VE20203  | 0.45 | 1 | 0.5  | 0.011   | 0.0092  | 0.01    | 0.011 | 0.0089 | 0.012 |
| Streptococcus_u_s                | 0.48 | 1 | 0.53 | 0.0024  | 0.0028  | 0.006   | 0     | 0      | 0     |
| Staphylococcus_u_s               | 0.48 | 1 | 0.53 | 0.0058  | 0.0049  | 0.0021  | 0     | 0.0035 | 0     |
| Clostridium_u_s                  | 0.49 | 1 | 0.54 | 0.003   | 0.0011  | 0.004   | 0     | 0      | 0     |
| Parabacteroides_sp_D13           | 0.51 | 1 | 0.56 | 0.002   | 0.0035  | 0.002   | 0     | 0      | 0     |
| Dorea_sp_52                      | 0.53 | 1 | 0.58 | 0.15    | 0.15    | 0.15    | 0.13  | 0.15   | 0.15  |
| Lachnospiraceae_bacterium_A4     | 0.55 | 1 | 0.6  | 0.19    | 0.14    | 0.15    | 0.18  | 0.14   | 0.13  |
| Yersinia_u_s                     | 0.6  | 1 | 0.62 | 0       | 0.00045 | 0.00063 | 0     | 0      | 0     |
| Sutterella_u_s                   | 0.6  | 1 | 0.62 | 0.0041  | 0.0023  | 0       | 0     | 0      | 0     |
| Streptomyces_u_s                 | 0.6  | 1 | 0.62 | 0.00045 | 0       | 0.00045 | 0     | 0      | 0     |
| Spingomonadaceae_u_s             | 0.6  | 1 | 0.62 | 0.00045 | 0.00045 | 0       | 0     | 0      | 0     |
| Ruminococcaceae_u_s              | 0.6  | 1 | 0.62 | 0.0013  | 0.0013  | 0       | 0     | 0      | 0     |
| Methylobacterium_u_s             | 0.6  | 1 | 0.62 | 0       | 0.00071 | 0.0013  | 0     | 0      | 0     |
| Lactococcus_lactis               | 0.6  | 1 | 0.62 | 0       | 0.00063 | 0.0011  | 0     | 0      | 0     |
| Lactobacillus_curvatus           | 0.6  | 1 | 0.62 | 0.00078 | 0.00078 | 0       | 0     | 0      | 0     |
| Holophagaceae_u_s                | 0.6  | 1 | 0.62 | 0.00084 | 0       | 0.001   | 0     | 0      | 0     |
| Gemmatimonas_u_s                 | 0.6  | 1 | 0.62 | 0.00063 | 0.00055 | 0       | 0     | 0      | 0     |
| Conchiformibius_u_s              | 0.6  | 1 | 0.62 | 0.00045 | 0       | 0.00045 | 0     | 0      | 0     |
| Bifidobacterium_longum           | 0.6  | 1 | 0.62 | 0.0011  | 0       | 0.0011  | 0     | 0      | 0     |
| Bacillus_u_s                     | 0.6  | 1 | 0.62 | 0.0015  | 0       | 0.0017  | 0     | 0      | 0     |
| Aciduliprofundum_u_s             | 0.6  | 1 | 0.62 | 0       | 0.0012  | 0.0011  | 0     | 0      | 0     |
| Subdoligranulum_u_s              | 0.66 | 1 | 0.68 | 0.0049  | 0.0026  | 0.009   | 0     | 0      | 0     |
| Oscillibacter_u_s                | 0.67 | 1 | 0.69 | 0.028   | 0.022   | 0.026   | 0.031 | 0.022  | 0.02  |
| Desulfosporosinus_u_s            | 0.67 | 1 | 0.69 | 0.0048  | 0.0079  | 0.006   | 0     | 0.01   | 0     |
| Lachnospiraceae_bacterium_MA2020 | 0.72 | 1 | 0.74 | 0.001   | 0.0024  | 0.0024  | 0     | 0      | 0     |
| Ruminococcus_flavifaciens        | 0.75 | 1 | 0.76 | 0.00063 | 0.0041  | 0.0042  | 0     | 0      | 0     |
| Helicobacter_sp_MIT_031614       | 0.75 | 1 | 0.76 | 0.00055 | 0.0013  | 0.00084 | 0     | 0      | 0     |
| Propionibacteriaceae_u_s         | 0.76 | 1 | 0.77 | 0.0034  | 0.0036  | 0.0023  | 0     | 0      | 0     |
| Bacteroides_cellulosilyticus     | 0.82 | 1 | 0.83 | 0.0033  | 0.0023  | 0.0037  | 0     | 0      | 0     |
| Staphylococcus_aureus            | 0.95 | 1 | 0.95 | 0.003   | 0.0041  | 0.0039  | 0     | 0      | 0     |
| Bilophila_wadsworthia            | 1    | 1 | 1    | 0.00095 | 0.00084 | 0.0016  | 0     | 0      | 0     |
